# Supplementary material for: Interaction with mammalian enteric viruses alters outer membrane vesicle production and content by commensal bacteria
Source: PubMed Central journal article supplement (PMC8725172; doi:10.1002/jev2.12172), 2022-01-04
Supplement: JEV2-11-e12172-s002.pdf [file JEV2-11-e12172-s002.pdf]

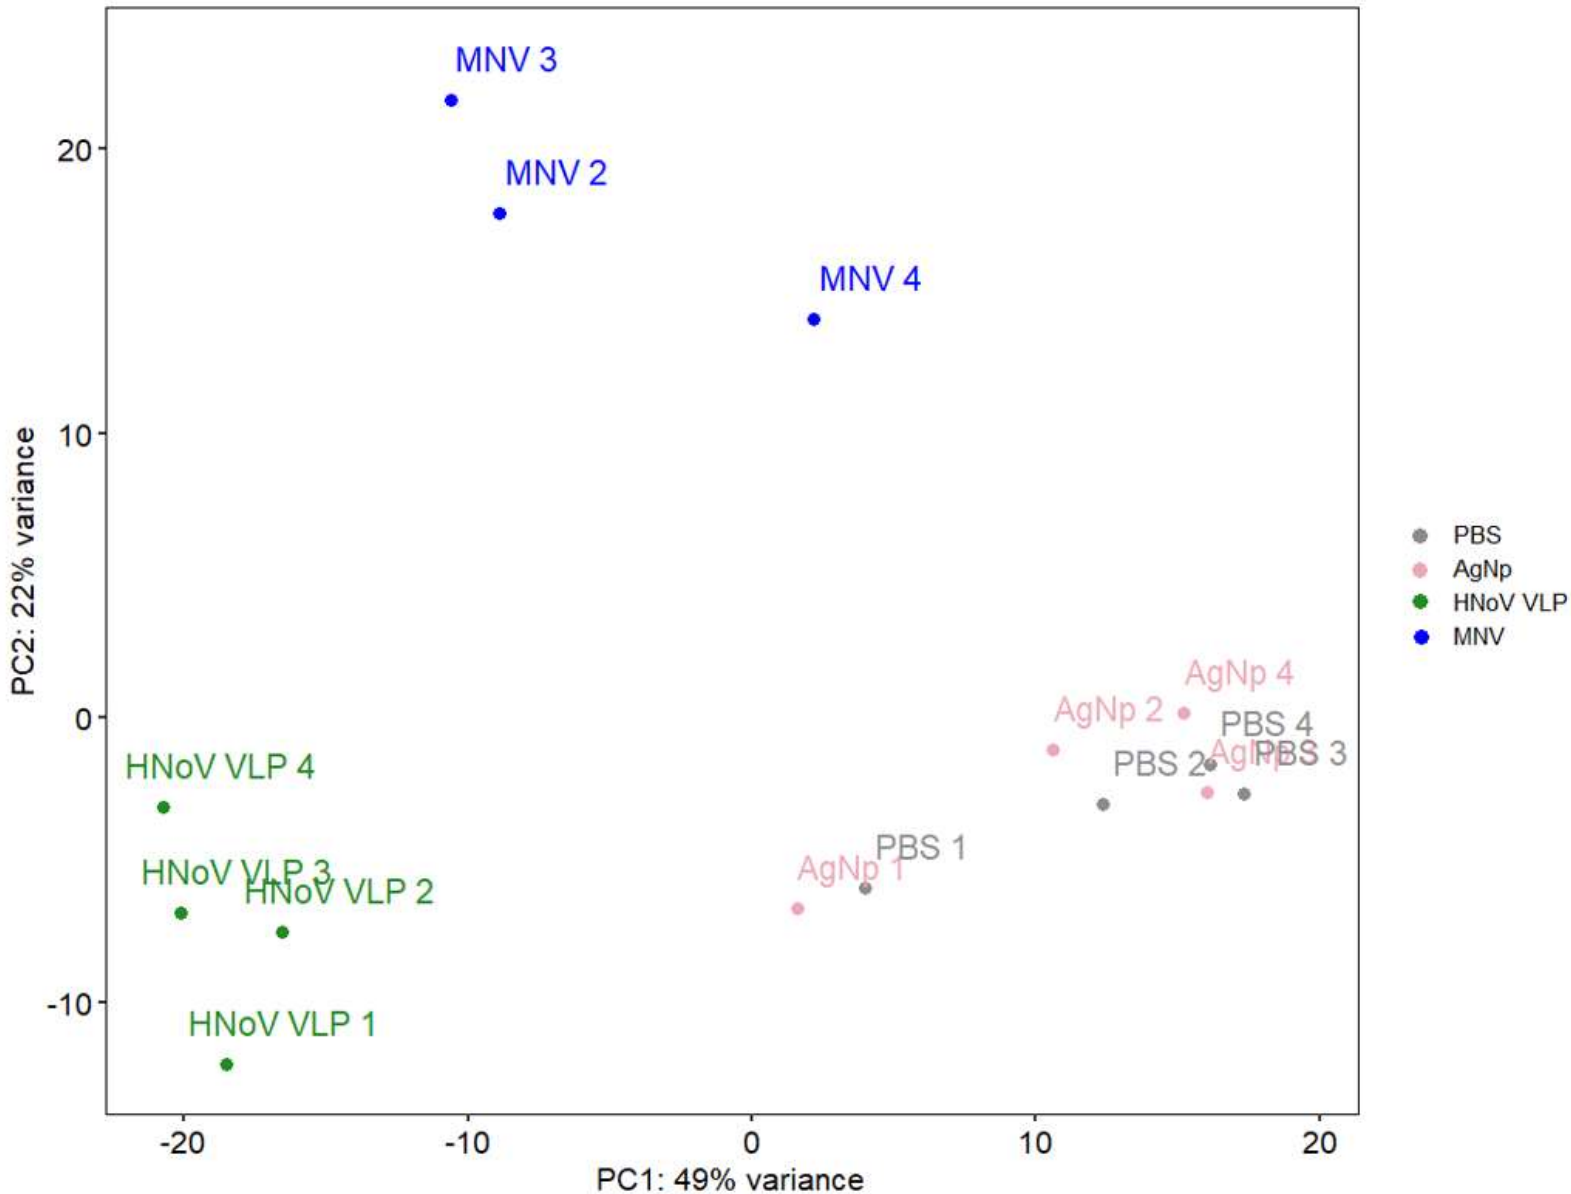

**Figure S1.** Differential gene expression by *E. cloacae* clusters based on virus exposure.. Cultures of *E. cloacae* ( $10^8$  CFU/mL) were incubated with MNV-1.CW3 (MOI = 1.0), HNoV GII.4 VLPs (0.1 mg/mL), AgNP (equivalent amount to HNoV) or PBS for 1 hr at 37°C. Principal component analysis of the transcriptional profiles of *E. cloacae* cells show distinct grouping of the mock cells (PBS ( $n = 4$ )) and AgNP ( $n = 4$ )), HNoV-attached cells ( $n = 4$ ), and MNV-attached cells ( $n = 3$ ). Raw data of RNA-seq was normalized using the cqn (conditional quantile normalization) and DESeq2 R packages, then rlog transformed.

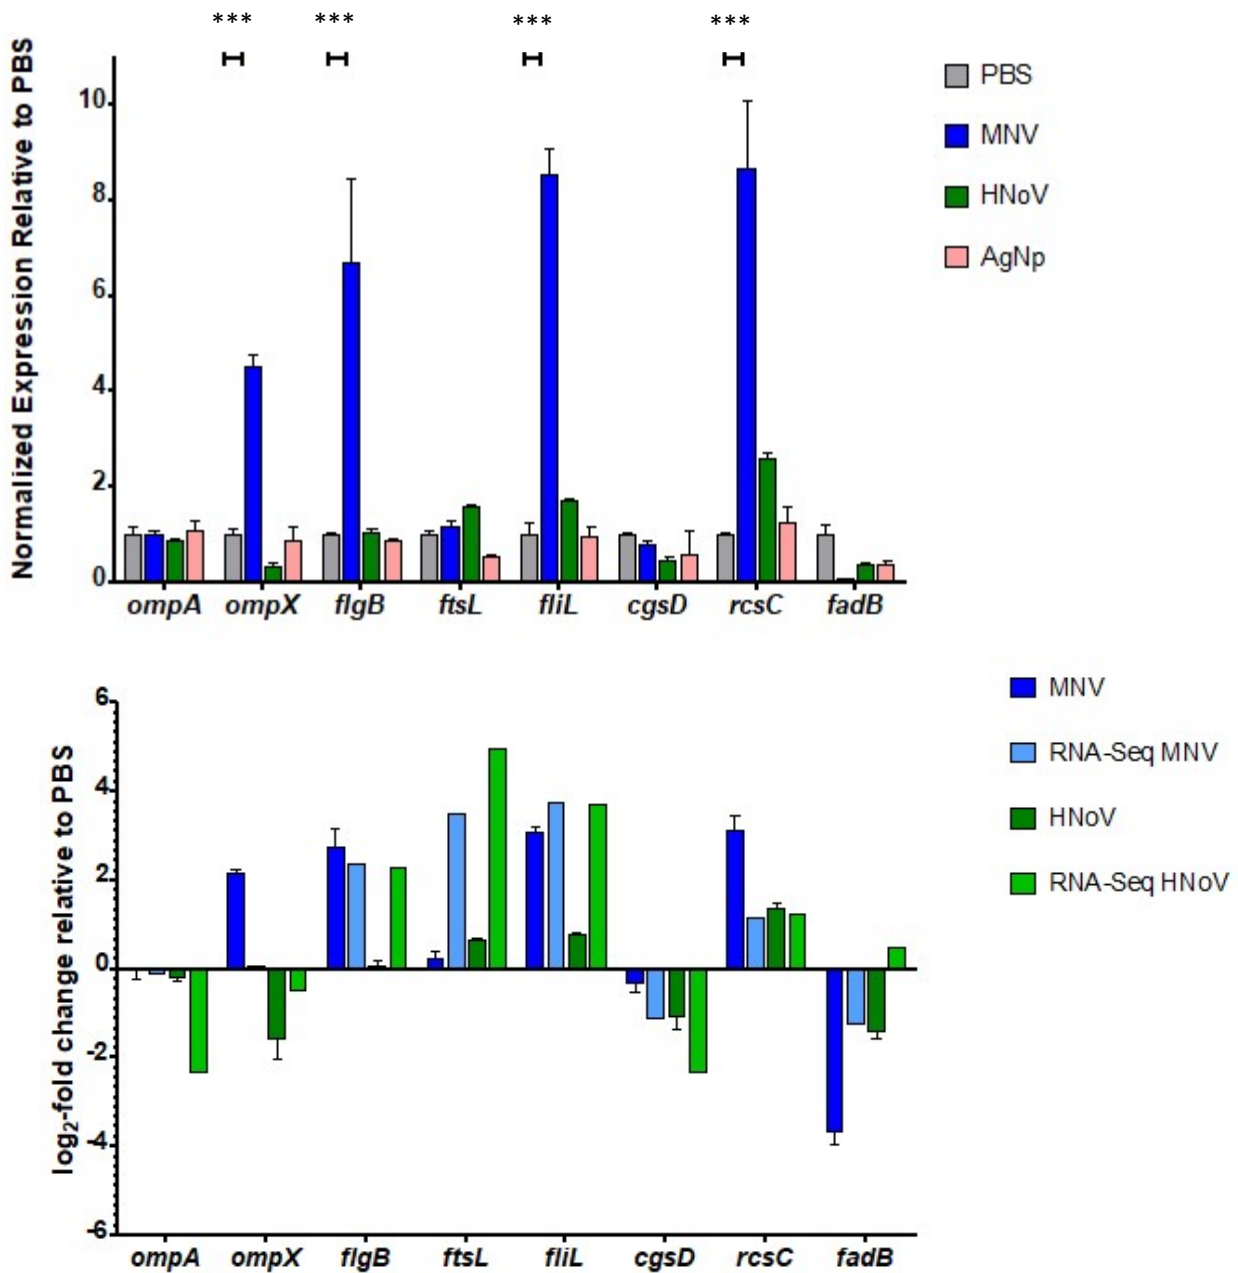

**Figure S2.** RT-qPCR validation of select genes differentially expressed in RNA-seq analysis. Log<sub>2</sub> normalized expression of these genes in RNA seq analyses was compared to qPCR expression analysis of *E. cloacae* after incubation with murine norovirus and human norovirus VLPS (n=3). The results show correlation (spearman coefficient of correlation = 0.762, p = 0.028 for MNV, and 0.619, p = 0.09 for HNoV) between the RNA-sequencing and the qPCR. AgNp condition is not shown as expression of these genes was not significantly altered in the RNA-sequencing analysis.

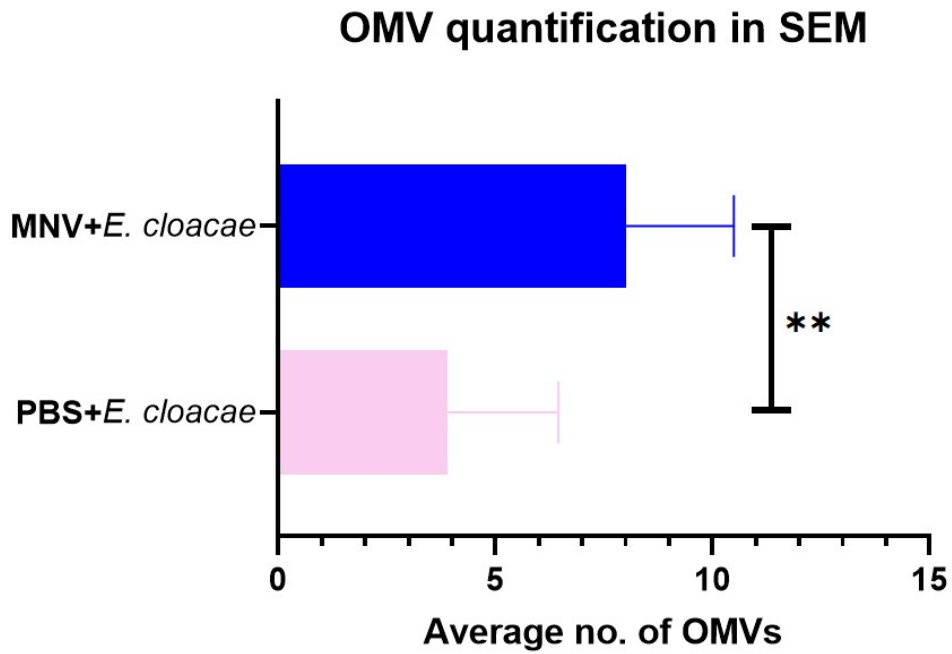

**Figure. S3.** *E. cloacae* produces more OMVs upon norovirus attachment. SEM analysis shows that MNV attachment leads to about 2-fold OMV release from *E. cloacae*. (n=10 frames each PBS and MNV)

**a**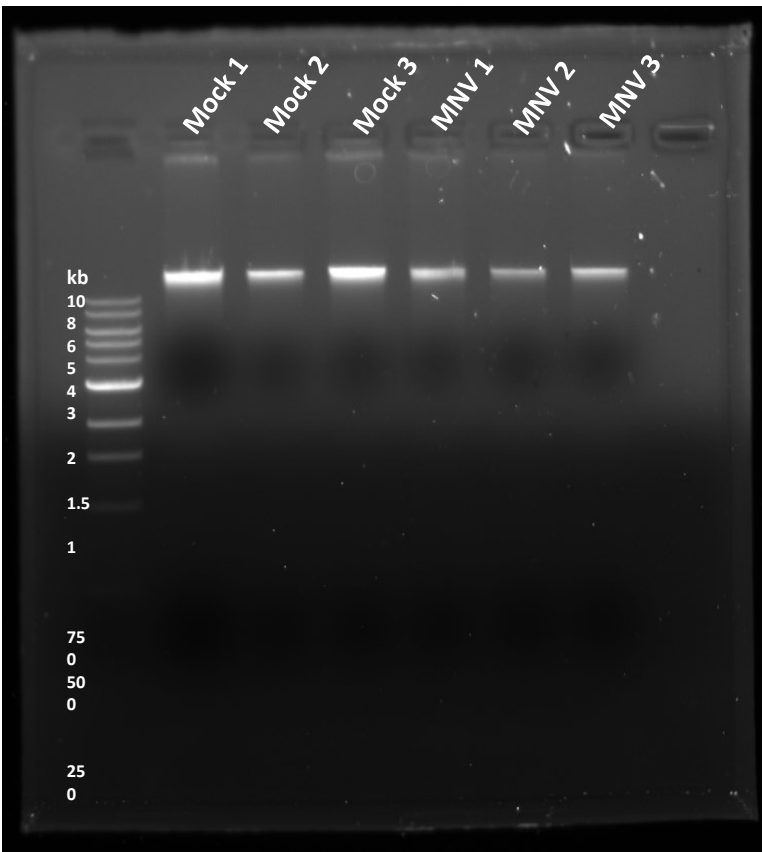**b**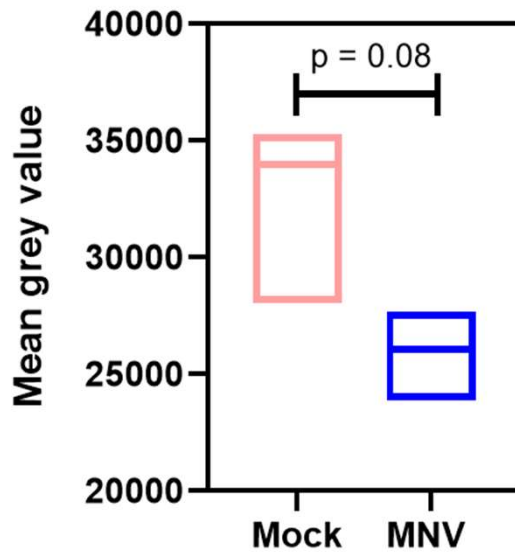

**Figure S4.** *E. cloacae* OMVs generated in the presence and absence of MNV contain DNA. **a.** A 1% agarose gel shows the presence of genomic DNA in OMVs derived from AgNP treated *E. cloacae* (mock) and MNV treated *E. cloacae* (MNV). **b.** ImageJ software was used to quantify the band intensity of the genomic DNA present in mock OMVs and MNV OMVs. (n=3)

**Table S1.** Differentially abundant OMV proteins.

| Identified Proteins                               | Accession      | T-Test p-value | Fold Change by Category | Function                                    | Location            |
|---------------------------------------------------|----------------|----------------|-------------------------|---------------------------------------------|---------------------|
| ribose transport system substrate-binding protein | YP_003615601.1 | 0.00083        | -16.6667                | transport                                   | periplasm           |
| capsid scaffold-like protein                      | YP_003614903.1 | < 0.00010      | -11.1111                | phage protein                               | cytoplasm           |
| 2-amino-3-ketobutyrate CoA ligase                 | YP_003610658.1 | 0.0002         | -10.0000                | biosynthesis                                | cytoplasm           |
| ATPase                                            | YP_003614179.1 | 0.012          | -10.0000                | chaperone                                   | cytoplasm           |
| acetate kinase                                    | YP_003614123.1 | 0.0023         | -5.0000                 | biosynthesis                                | cytoplasm           |
| copper resistance protein B (plasmid)             | YP_003602514.1 | 0.0023         | -5.0000                 | homeostasis                                 | outer membrane      |
| glycerol-3-phosphate dehydrogenase                | YP_003615265.1 | 0.0039         | -5.0000                 | metabolism                                  | cytoplasm           |
| DNA-directed RNA polymerase subunit beta          | YP_003610761.1 | 0.003          | -3.3333                 | transcription                               | cytoplasm           |
| succinate semialdehyde dehydrogenase              | YP_003615099.1 | 0.012          | -3.3333                 | catabolism                                  | cytoplasm           |
| 6-phosphogluconolactonase                         | YP_003613455.1 | 0.012          | -3.3333                 | glucose metabolism, pentose phosphate shunt | cytoplasm           |
| C4-dicarboxylate transporter DctA                 | YP_003615405.1 | 0.036          | -3.3333                 | transport                                   | inner membrane      |
| flagellar basal body rod protein FlgG             | YP_003613052.1 | 0.039          | -3.3333                 | cell motility                               | extracellular       |
| Ferric aerobactin receptor                        | YP_003613803.1 | 0.039          | -3.3333                 | homeostasis                                 | cell outer membrane |
| fructose-1,6-bisphosphatase                       | YP_003611152.1 | 0.039          | -3.3333                 | gluconeogenesis                             | cytoplasm           |
| putative fimbrial protein                         | YP_003611793.1 | 0.039          | -3.3333                 | Cell adhesion                               | extracellular       |
| putative protease                                 | YP_003612209.1 | 0.048          | -3.3333                 | hydrolase                                   | cytoplasm           |

|                                                     |                |         |         |                            |                         |
|-----------------------------------------------------|----------------|---------|---------|----------------------------|-------------------------|
| putative outer membrane lipoprotein                 | YP_003614419.1 | 0.029   | -2.5000 | transport,<br>pathogenesis | cell outer<br>membrane  |
| ribose-phosphate pyrophosphokinase                  | YP_003612101.1 | 0.00073 | -2.0000 | biosynthesis               | cytoplasm               |
| 2,5-diketo-D-gluconate reductase A                  | YP_003614813.1 | 0.0054  | -2.0000 | biosynthesis               | cytoplasm               |
| uracil phosphoribosyltransferase                    | YP_003614271.1 | 0.0054  | -2.0000 | metabolism                 | cytoplasm               |
| L-lactate dehydrogenase                             | YP_003610677.1 | 0.018   | -2.0000 | oxidoreductase             | cytoplasmic<br>membrane |
| hypothetical protein ECL_01558                      | YP_003612066.1 | 0.037   | -1.6667 | phage protein              | extracellular           |
| chlorinating enzyme                                 | YP_003614439.1 | 0.0061  | 2.1000  | biosynthesis               | extracellular           |
| Soluble cytochrome b562                             | YP_003612788.1 | 0.0078  | 2.1000  | electron<br>transport      | periplasm               |
| DL-methionine transporter substrate-binding subunit | YP_003611513.1 | 0.05    | 2.1000  | transport                  | cytoplasmic<br>membrane |
| hypothetical protein ECL_04498                      | YP_003614976.1 | 0.032   | 2.4000  | stress response            | membrane                |
| preprotein translocase subunit SecD                 | YP_003611675.1 | 0.035   | 2.4000  | transport                  | cytoplasmic<br>membrane |
| flagellar L-ring protein FlgH                       | YP_003613051.1 | 0.017   | 4.6000  | motor activity             | cell outer<br>membrane  |

**Table S2.** Differentially abundant OMV proteins whose genes were differentially expressed in *E. cloacae* upon norovirus interaction.

| <b>Differentially Abundant Proteins</b>                            |                    |                  |                      |
|--------------------------------------------------------------------|--------------------|------------------|----------------------|
| <b>MNV Upregulated by at least 1 log<sub>2</sub> fold change</b>   |                    |                  |                      |
| <b>Identified Proteins</b>                                         | <b>Function</b>    | <b>Gene Name</b> | <b>Gene Locus ID</b> |
| chlorinating enzyme                                                | biosynthesis       |                  | ECL_03956            |
| Soluble cytochrome b562                                            | electron-transport |                  | ECL_02291            |
| preprotein translocase subunit SecD                                | transport          | secD             | ECL_01165            |
| <b>MNV Downregulated by at least 1 log<sub>2</sub> fold change</b> |                    |                  |                      |
| <b>Identified Proteins</b>                                         | <b>Function</b>    | <b>Gene Name</b> | <b>Gene Locus ID</b> |
| succinate semialdehyde dehydrogenase                               | catabolism         |                  | ECL_04622            |
| fructose-1,6-bisphosphatase                                        | gluconeogenesis    | fbp              | ECL_00637            |
| putative fimbrial protein                                          | cell adhesion      | <i>fimF</i>      | ECL_01283            |
| OmpA family protein                                                | transport          |                  | ECL_03936            |

**Table S3.** Proteins uniquely absent or present in MNV OMVs.

| Absent in MNV OMVs                                                           |                                            | Present in MNV OMVs                                                |                               |
|------------------------------------------------------------------------------|--------------------------------------------|--------------------------------------------------------------------|-------------------------------|
| Identified Proteins                                                          | Function                                   | Identified Proteins                                                | Function                      |
| 2-amino-3-ketobutyrate CoA ligase                                            | biosynthetic process                       | chlorinating enzyme                                                | biosynthetic process          |
| acetate kinase                                                               | biosynthetic process                       | ADP-L-glycero-D-manno-heptose-6-epimerase                          | biosynthetic process          |
| 2,5-diketo-D-gluconate reductase A                                           | L-ascorbic acid biosynthetic process       | cysteine synthase A                                                | cysteine biosynthetic process |
| 3-octaprenyl-4-hydroxybenzoate carboxylase                                   | ubiquinone biosynthetic process            | agmatinase                                                         | biosynthetic process          |
| ketol-acid reductoisomerase                                                  | isoleucine and valine biosynthetic process | acetyl-CoA carboxylase, carboxyl transferase subunit beta          | fatty acid biosynthesis       |
| dihydropteroate synthase                                                     | folic acid biosynthetic process            | carbamoyl-phosphate synthase small subunit                         | biosynthetic process          |
| UTP-glucose-1-phosphate uridylyltransferase                                  | lipopolysaccharide biosynthetic process    | ATP-dependent protease                                             | biosynthetic process          |
| ribose transport system substrate-binding protein                            | transport                                  | spermidine/putrescine transport system substrate-binding protein   | transport                     |
| putative outer membrane usher protein                                        | transport                                  | ribose transport system substrate-binding protein                  | transport                     |
| putative glycine/betaine/choline ABC transporter substrate-binding component | transport                                  | glycine betaine/proline transport system substrate-binding protein | transport                     |
| extracellular solute-binding protein                                         | transport                                  | extracellular ligand-binding receptor                              | transport                     |
| copper resistance protein B (plasmid)                                        | cellular copper ion homeostasis            | arginine transporter, periplasmic binding protein                  | transport                     |



|                                                 |                                               |                                                              |                                 |
|-------------------------------------------------|-----------------------------------------------|--------------------------------------------------------------|---------------------------------|
| Ferric aerobactin receptor                      | iron ion homeostasis                          | hypothetical protein ECL_00179                               | transport                       |
| hypothetical protein ECL_02069                  | stress response                               | bacterioferritin                                             | transport, homeostasis          |
| universal stress protein                        | stress response                               | copper resistant protein PcoB                                | homeostasis                     |
| silver binding protein precursor SilE (plasmid) | stress response                               | Ferric aerobactin receptor                                   | iron ion homeostasis            |
| OsmC family protein                             | stress response                               | copper resistance protein B (plasmid)                        | cellular copper ion homeostasis |
| single-strand DNA-binding protein Ssb           | DNA replication and repair                    | RNA polymerase factor sigma-32                               | stress response                 |
| uracil phosphoribosyltransferase                | nucleoside metabolic process                  | putative catalase                                            | stress response                 |
| flagellar basal body rod protein FlgG           | cell motility                                 | methylmalonate-semialdehyde dehydrogenase                    | oxidoreductase                  |
| fructose-1,6-bisphosphatase                     | gluconeogenesis                               | glycine dehydrogenase                                        | oxidoreductase                  |
| PTS system glucose-specific EIICB component     | PEP dependent sugar phosphotransferase system | alcohol dehydrogenase                                        | oxidoreductase                  |
| carbamate kinase                                | metabolism                                    | cytochrome o ubiquinol oxidase subunit II                    | oxidoreductase                  |
| nucleoside triphosphatase, D5 family, partial   | hydrolase                                     | NADH:ubiquinone oxidoreductase, chain C,D                    | oxidoreductase                  |
| ATP-dependent Clp protease proteolytic subunit  | hydrolase                                     | cytochrome d ubiquinol oxidase subunit III                   | oxidoreductase                  |
| hypothetical protein ECL_02463                  | oxidoreductase                                | 5-carboxymethyl-2-hydroxymuconate semialdehyde dehydrogenase | oxidoreductase                  |
| transcription termination factor Rho            | transcription                                 | cytochrome bd-I oxidase subunit II                           | oxidoreductase                  |

|                                        |                       |                                                              |                                               |
|----------------------------------------|-----------------------|--------------------------------------------------------------|-----------------------------------------------|
| translation initiation factor IF-3     | translation           | murein hydrolase B                                           | hydrolase                                     |
| tyrosyl-tRNA synthetase                | aminoacylation        | serine endoprotease                                          | hydrolase                                     |
| rod shape-determining protein mreB     | determines cell shape | ATP-dependent OLD family endonuclease                        | hydrolase                                     |
| Flagellar basal-body rod protein, FlgC | cell motility         | bifunctional UDP-sugar hydrolase/5'-nucleotidase periplasmic | nucleotide catabolism, hydrolase              |
| putative fimbrial protein              | Cell adhesion         | 3-ketoacyl-CoA thiolase                                      | Fatty acid beta oxidation                     |
| hypothetical protein ECL_04497         | unknown               | multifunctional fatty acid oxidation complex subunit alpha   | Fatty acid beta oxidation                     |
| putative outer membrane lipoprotein    | unknown               | acyl-CoA dehydrogenase                                       | Fatty acid beta oxidation                     |
| hypothetical protein ECL_02480         | unknown               | 50S ribosomal protein L16                                    | translation                                   |
| hypothetical protein ECL_00450         | unknown               | translation initiation factor IF-2                           | translation                                   |
| capsid scaffold-like protein           | phage protein         | 30S ribosomal protein S10                                    | translation                                   |
|                                        |                       | 50S ribosomal protein L14                                    | translation                                   |
|                                        |                       | 50S ribosomal protein L6                                     | translation                                   |
|                                        |                       | maltodextrin phosphorylase                                   | carbohydrate metabolism                       |
|                                        |                       | 2,3-bisphosphoglycerate-independent phosphoglycerate mutase  | glycolysis, gluconeogenesis                   |
|                                        |                       | malate dehydrogenase                                         | TCA, metabolism                               |
|                                        |                       | Aspartate ammonia-lyase                                      | TCA                                           |
|                                        |                       | PTS system mannitol-specific transporter subunit IIC         | PEP dependent sugar phosphotransferase system |

|                                                    |                             |
|----------------------------------------------------|-----------------------------|
| peptidyl-prolyl cis-trans isomerase                | protein folding             |
| putative sensory transduction regulator            | unstable protein stabilizer |
| ATPase                                             | chaperone                   |
| beta-ketoacyl-ACP synthase                         | lipid metabolism            |
| antimicrobial peptide ABC transporter              | lipid metabolism            |
| replicative DNA helicase                           | DNA replication             |
| succinylglutamic semialdehyde dehydrogenase        | catabolism                  |
| L-threonine 3-dehydrogenase                        | catabolism                  |
| murein transglycosylase C                          | PG metabolism               |
| hypothetical protein ECL_01167                     | enzymatic                   |
| non-heme chloroperoxidase                          | enzymatic                   |
| putative ureidoglycine-glyoxylate aminotransferase | enzymatic                   |
| putative S-transferase                             | enzymatic                   |
| putative short-chain alcohol dehydrogenase         | enzymatic                   |
| two-component response regulator                   | transcription regulation    |
| ecotin                                             | protease inhibitor          |
| lipoyl synthase                                    | protein lipoylation         |
| DNA polymerase III subunit alpha                   | DNA replication             |
| hypothetical protein ECL_04364                     | biofilm formation           |

|  |                                                                    |                              |
|--|--------------------------------------------------------------------|------------------------------|
|  | conjugal transfer mating pair stabilization protein TraG (plasmid) | cell interactions            |
|  | hypothetical protein ECL_03858                                     | cell shape regulation        |
|  | flagellar hook-associated 2 domain-containing protein              | cell motility, cell adhesion |

**Table S4.** Bacterial isolates used in experiments.

| Name                                     | ATCC Number | Source                                     |
|------------------------------------------|-------------|--------------------------------------------|
| <i>Enterobacter cloacae</i> (EC)         | 13047       | ATCC                                       |
| <i>Bacteroides thetaiotaomicron</i> (BT) | 29148       | Dr. Stephanie Karst, University of Florida |
| <i>Lactobacillus acidophilus</i> (LA)    | 4356        | Dr. Graciela Lorca, University of Florida  |

**Table S5.** Primers used for RT-qPCR validation.

| <b>Gene</b>     | <b>Sequence (5'-&gt;3')</b> |
|-----------------|-----------------------------|
| rpoB-Fwd        | TACGCGTCGACCCAACCAAC        |
| rpoB-Rev        | TCGATCTCATCGCGCAGCAG        |
| groL-Fwd        | CCAACAACGTGAAAGCGGGC        |
| groL-Rev        | GCCGCATACTGCAGAGCAGA        |
| cgsD-Fwd        | ACCGCGAGAAAGAGATCCTG        |
| cgsD-Rev        | ACCGCCTGAGTTCGGTTTTT        |
| fadB-Fwd        | CGCAGGTAAAGATGTTGGCG        |
| fadB-Rev        | GTTTGGCCTTCCAGTCGAGA        |
| flgB-Fwd        | GCGCCCACGACCGATTTACT        |
| flgB-Rev        | ACGCTCCCGGTCCATATCCA        |
| fliI-Fwd        | GGCCGAAGCCGGACACTATC        |
| fliI-Rev        | GTTGCGCTGGAAGCTGGAGA        |
| ftsL-Fwd        | TAGGAAGCAACGAGCGCCAT        |
| ftsL-Rev        | GCAGAGTGGCAGCTTCCCAA        |
| ompA family-Fwd | GCAGCGGTGACAACATCATC        |
| OmpA family-Rev | ATCACATTCACGGCGGTCTT        |
| ompX-Fwd        | ACGACTGGGCAAGCATCTAC        |
| ompX-Rev        | GAGAAGCCGTAGTCGCTGTT        |
| rscC-Fwd        | GGCTGGCAATTTGTGAGAAG        |
| rscC-Rev        | GCGCAGAATAGAGCGGAATA        |
